# Supplementary material for: Sperm function in vitro and fertility after antibiotic-free, hypothermic storage of liquid preserved boar semen
Source: PubMed Central journal article supplement (PMC6791940; doi:10.1038/s41598-019-51319-1), 2019-10-14
Supplement: 41598_2019_51319_MOESM1_ESM.pdf [file 41598_2019_51319_MOESM1_ESM.pdf]

## Supplementary information

### **Sperm function in vitro and fertility after antibiotic-free, hypothermic storage of liquid preserved boar semen**

Dagmar Waberski<sup>1</sup>, Anne-Marie Luther<sup>1</sup>, Benita Grünther<sup>1</sup>, Helen Jäkel<sup>1</sup>, Heiko Henning<sup>1,2</sup>, Charlotte Vogel<sup>3</sup>, Wolfgang Peralta<sup>4</sup> & Karl Fritz Weitze<sup>1</sup>

1 Unit for Reproductive Medicine of Clinics/Clinic for Pigs and Small Ruminants, University of Veterinary Medicine Hannover, Bünteweg 15, D-30559 Hannover, Germany

2 Department of Equine Sciences, Faculty of Veterinary Medicine, Utrecht University, Yalelaan 112, 3584 CM Utrecht, The Netherlands

3 Institute for Biometry, Epidemiology and Information Processing (IBEI), University of Veterinary Medicine Hannover, Bünteweg 2, D-30559 Hannover, Germany

4 Agricola Super Ltda., Rancagua, Chile

\* Corresponding author: [dagmar.waberski@tiho-hannover.de](mailto:dagmar.waberski@tiho-hannover.de)

### Supplemental Figure S1

Bacteria growth in culture media and antibiotic-free BTS semen extender after storage for 72 h at 5°C and 17°C. Sterile media were inoculated with  $10^3$  CFU (colony forming units)/ml with four typical mesophilic gram-negative bacteria strains isolated from boar semen.

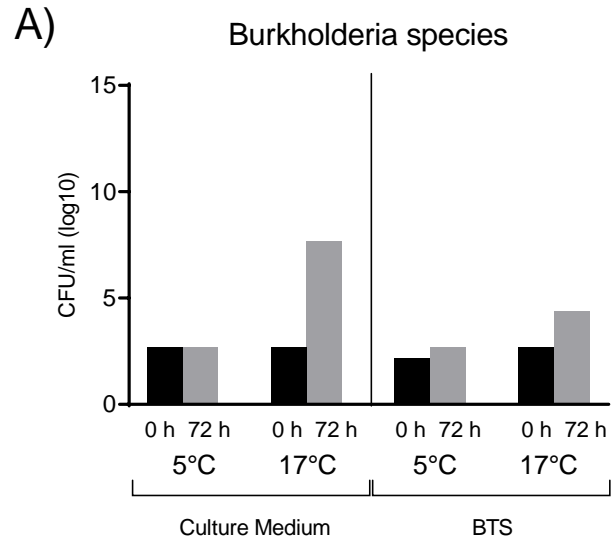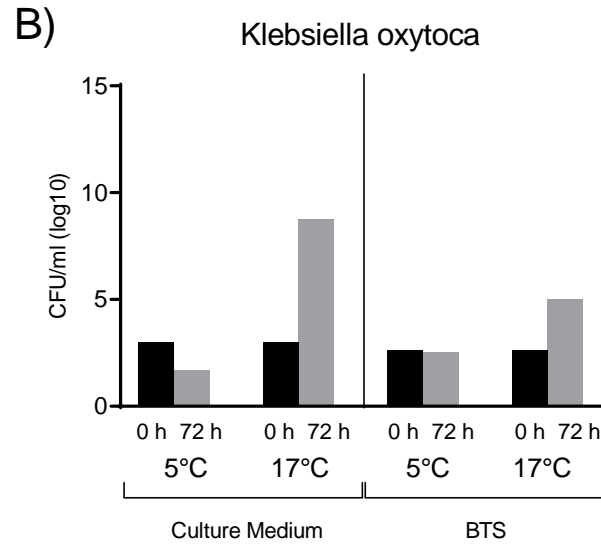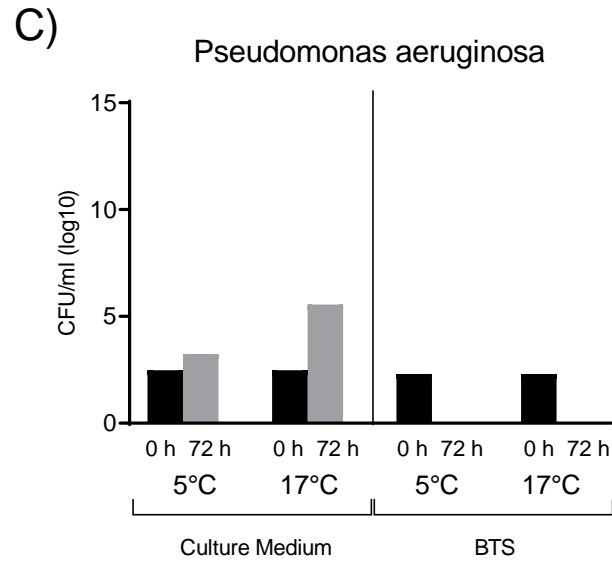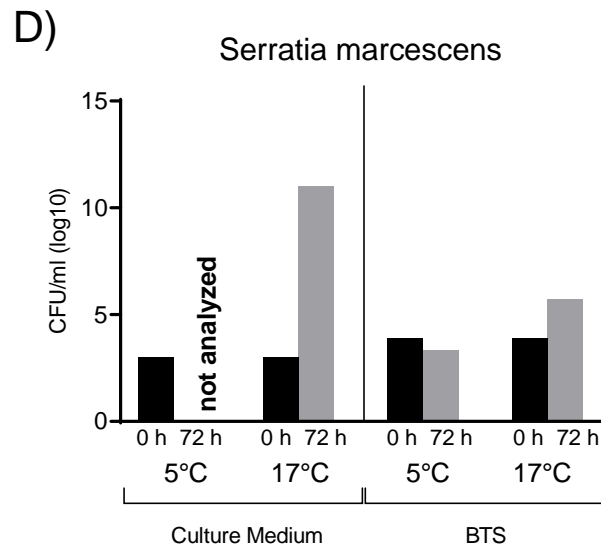

Supplemental Table S1:

Results of the two-way repeated measures ANOVA and selected pairwise comparisons within temperature/extender treatment (A) and storage time point (B). Global p values of the two-way repeated measures ANOVA are reported in brackets (trt = temperature-extender treatment, time = storage time, trt x time = temperature-extender x time interaction). Bonferroni post-hoc tests were carried out within each level of temperature-extender treatment and each level of storage time. Estimated differences are reported with 95% confidence intervals. MI = Membrane integrity (propidium iodide and FITC-PNA negative sperm), DFI= DNA fragmentation index, \*P ≤ 0.05, \*\*P ≤ 0.01, \*\*\*P ≤ 0.001.

A)

| Comparison                                                           | 24 h                  | 72 h                  | 144 h                 |
|----------------------------------------------------------------------|-----------------------|-----------------------|-----------------------|
| <b>Motility %</b> (trt: p<0.001, time: p<0.001, trt x time: p=0.033) |                       |                       |                       |
| 17/APrem - 17/BTS                                                    | 5.3 [ -1.2, 11.8]     | 3.3 [ -3.2, 9.8]      | 6.4 [ -0.1, 12.9]     |
| 17/APrem - 5/APrem                                                   | 7.9 [ 1.4, 14.3]**    | 4.3 [ -2.2, 10.8]     | 6.2 [ -0.3, 12.7]     |
| 17/APrem - 5/BTS                                                     | 17.3 [ 10.8, 23.8]*** | 18.4 [ 11.9, 24.9]*** | 22.1 [ 15.6, 28.6]*** |
| 17/BTS - 5/APrem                                                     | 2.5 [ -4.0, 9.0]      | 1.0 [ -5.5, 7.5]      | -0.2 [ -6.7, 6.3]     |
| 17/BTS - 5/BTS                                                       | 12.0 [ 5.5, 18.5]***  | 15.1 [ 8.6, 21.6]***  | 15.7 [ 9.2, 22.2]***  |
| 5/APrem - 5/BTS                                                      | 9.4 [ 2.9, 15.9]***   | 14.1 [ 7.6, 20.6]***  | 15.9 [ 9.4, 22.4]***  |
| <b>MI %</b> (trt: p<0.001, time: p=0.238, trt x time: p=0.0272)      |                       |                       |                       |
| 17/APrem - 17/BTS                                                    | 0.7 [ -3.8, 5.2]      | 1.8 [ -2.7, 6.2]      | 2.1 [ -2.4, 6.6]      |
| 17/APrem - 5/APrem                                                   | 1.0 [ -3.5, 5.5]      | 2.9 [ -1.5, 7.4]      | 1.9 [ -2.6, 6.4]      |
| 17/APrem - 5/BTS                                                     | 4.9 [ 0.4, 9.4]*      | 9.3 [ 4.8, 13.8]***   | 5.7 [ 1.2, 10.2]**    |
| 17/BTS - 5/APrem                                                     | 0.3 [ -4.2, 4.8]      | 1.2 [ -3.3, 5.7]      | -0.2 [ -4.6, 4.3]     |
| 17/BTS - 5/BTS                                                       | 4.1 [ -0.3, 8.6]      | 7.6 [ 3.1, 12.1]***   | 3.6 [ -0.9, 8.1]      |
| 5/APrem - 5/BTS                                                      | 3.9 [ -0.6, 8.3]      | 6.4 [ 1.9, 10.9]***   | 3.8 [ -0.7, 8.3]      |
| <b>DFI</b> (trt: p=0.048)                                            |                       |                       |                       |
| 17/APrem - 17/BTS                                                    | .                     | 0.1 [ -0.1, 0.3]      | .                     |
| 17/APrem - 5/APrem                                                   | .                     | -0.0 [ -0.2, 0.2]     | .                     |
| 17/APrem - 5/BTS                                                     | .                     | 0.2 [ -0.0, 0.4]      | .                     |
| 17/BTS - 5/APrem                                                     | .                     | -0.1 [ -0.3, 0.1]     | .                     |
| 17/BTS - 5/BTS                                                       | .                     | 0.1 [ -0.1, 0.3]      | .                     |
| 5/APrem - 5/BTS                                                      | .                     | 0.2 [ -0.0, 0.4]      | .                     |

B)

| Comparison        | 17/APrem          | 17/BTS            | 5/APrem           | 5/BTS               |
|-------------------|-------------------|-------------------|-------------------|---------------------|
| <b>Motility %</b> |                   |                   |                   |                     |
| 24 h – 72 h       | 2.7 [ -1.9, 7.4]  | 0.7 [ -3.9, 5.3]  | -0.9 [ -5.5, 3.8] | 3.8 [ -0.8, 8.4]    |
| 24 h – 144 h      | 3.8 [ -0.9, 8.4]  | 4.8 [ 0.2, 9.5]*  | 2.1 [ -2.5, 6.8]  | 8.6 [ 4.0, 13.2]*** |
| 72 h – 144 h      | 1.0 [ -3.6, 5.6]  | 4.1 [ -0.5, 8.8]  | 3.0 [ -1.6, 7.6]  | 4.8 [ 0.2, 9.4]*    |
| <b>MI %</b>       |                   |                   |                   |                     |
| 24 h – 72 h       | -1.3 [ -5.7, 3.2] | -0.2 [ -4.7, 4.2] | 0.7 [ -3.8, 5.1]  | 3.2 [ -1.3, 7.7]    |
| 24 h – 144 h      | -1.4 [ -5.8, 3.1] | -0.0 [ -4.5, 4.4] | -0.5 [ -4.9, 4.0] | -0.5 [ -5.0, 3.9]   |
| 72 h – 144 h      | -0.1 [ -4.6, 4.4] | 0.2 [ -4.2, 4.7]  | -1.1 [ -5.6, 3.3] | -3.7 [ -8.2, 0.7]   |

17/APrem: Semen stored at 17°C in AndroStar Premium extender with antibiotic.

17/BTS: Semen stored at 17°C in BTS extender with antibiotic.

5/APrem: Semen stored at 5°C in AndroStar Premium extender without antibiotic.

5/BTS: Semen stored at 5°C in BTS extender with antibiotic.

Supplemental Table S2:

Sperm quality by temperature/extender treatment and storage time point (24 h, 72 h, 144 h). All results (n=12) are mean  $\pm$  SEM. DFI was measured at 72 h only. MI = Membrane integrity (propidium iodide and FITC-PNA negative sperm), DFI= DNA fragmentation index.

|                   | 24 h            | 72 h            | 144 h           |
|-------------------|-----------------|-----------------|-----------------|
| <b>Motility %</b> |                 |                 |                 |
| 17/APrem          | 92.6 $\pm$ 0.9  | 89.8 $\pm$ 0.7  | 88.8 $\pm$ 0.9  |
| 17/BTS            | 87.2 $\pm$ 1.29 | 86.5 $\pm$ 1.39 | 82.4 $\pm$ 2.29 |
| 5/APrem           | 84.7 $\pm$ 1.69 | 85.6 $\pm$ 2.39 | 82.6 $\pm$ 2.39 |
| 5/BTS             | 75.3 $\pm$ 2.5  | 71.5 $\pm$ 2.1  | 66.7 $\pm$ 2.79 |
| <b>MI %</b>       |                 |                 |                 |
| 17/APrem          | 90.8 $\pm$ 1.2  | 92.1 $\pm$ 0.5  | 92.2 $\pm$ 0.5  |
| 17/BTS            | 90.1 $\pm$ 1.0  | 90.3 $\pm$ 0.5  | 90.1 $\pm$ 0.7  |
| 5/APrem           | 89.8 $\pm$ 1.2  | 89.2 $\pm$ 1.2  | 90.3 $\pm$ 0.9  |
| 5/BTS             | 86.0 $\pm$ 1.5  | 82.8 $\pm$ 1.9  | 86.5 $\pm$ 1.1  |
| <b>DFI %</b>      |                 |                 |                 |
| 17/APrem          | .               | 1.7 $\pm$ 0.2   | .               |
| 17/BTS            | .               | 1.6 $\pm$ 0.2   | .               |
| 5/APrem           | .               | 1.7 $\pm$ 0.2   | .               |
| 5/BTS             | .               | 1.5 $\pm$ 0.2   | .               |

17/APrem: Semen stored at 17°C in AndroStar Premium extender with antibiotic.

17/BTS: Semen stored at 17°C in BTS extender with antibiotic.

5/APrem: Semen stored at 5°C in AndroStar Premium extender without antibiotic.

5/BTS: Semen stored at 5°C in BTS extender with antibiotic.

Supplemental Table S3:

Results of the two-way repeated measures ANOVA and selected pairwise comparisons of live, low calcium (propidium iodide and Fluo-3-AM negative) spermatozoa (%) within temperature/extender treatment (A) and incubation time (B). Global p values of the two-way repeated measures ANOVA are reported in brackets (trt = temperature-extender treatment, time = storage time, trt x time = temperature-extender x time interaction). Bonferroni post-hoc tests were carried out within each level of temperature-extender treatment and each level of storage time. Estimated differences are reported with 95% confidence intervals. \*P ≤ 0.05, \*\*P ≤ 0.01, \*\*\*P ≤ 0.001.

A)

| Comparison                                                         | 3 min                 | 60 min                | 120 min               | 180 min               |
|--------------------------------------------------------------------|-----------------------|-----------------------|-----------------------|-----------------------|
| <b>Tyrode C</b> (trt: p<0.001, time: p<0.001, trt x time: p=0.081) |                       |                       |                       |                       |
| 17/APrem - 17/BTS                                                  | 3.2 [ -4.0, 10.4]     | 1.4 [ -6.6, 9.3]      | 1.8 [ -7.8, 11.4]     | 2.8 [ -8.4, 14.0]     |
| 17/APrem - 5/APrem                                                 | 4.0 [ -3.2, 11.2]     | 3.6 [ -4.4, 11.5]     | 5.2 [ -4.4, 14.8]     | 5.8 [ -5.4, 17.0]     |
| 17/APrem - 5/BTS                                                   | 20.5 [ 13.3, 27.7]*** | 20.1 [ 12.1, 28.0]*** | 23.8 [ 14.2, 33.4]*** | 24.9 [ 13.7, 36.1]*** |
| 17/BTS - 5/APrem                                                   | 0.8 [ -6.4, 8.0]      | 2.2 [ -5.8, 10.1]     | 3.4 [ -6.2, 13.0]     | 3.0 [ -8.2, 14.2]     |
| 17/BTS - 5/BTS                                                     | 17.3 [ 10.1, 24.5]*** | 18.7 [ 10.8, 26.7]*** | 22.0 [ 12.4, 31.6]*** | 22.1 [ 10.9, 33.3]*** |
| 5/APrem - 5/BTS                                                    | 16.5 [ 9.3, 23.7]***  | 16.5 [ 8.6, 24.5]***  | 18.7 [ 9.1, 28.3]***  | 19.1 [ 7.9, 30.3]***  |
| <b>Tyrode A</b> (trt: p<0.001, time: p<0.001, trt x time: p=0.118) |                       |                       |                       |                       |
| 17/APrem - 17/BTS                                                  | 3.8 [ -3.1, 10.8]     | 8.9 [ -5.4, 23.2]     | 13.7 [ -8.2, 35.5]    | 15.3 [ -11.3, 41.9]   |
| 17/APrem - 5/APrem                                                 | 4.1 [ -2.9, 11.0]     | 7.4 [ -6.9, 21.7]     | 5.1 [ -16.8, 26.9]    | 1.9 [ -24.8, 28.5]    |
| 17/APrem - 5/BTS                                                   | 21.2 [ 14.2, 28.2]*** | 26.9 [ 12.6, 41.1]*** | 27.1 [ 5.2, 48.9]**   | 24.6 [ -2.1, 51.2]    |
| 17/BTS - 5/APrem                                                   | 0.2 [ -6.8, 7.2]      | -1.5 [ -15.8, 12.8]   | -8.6 [ -30.4, 13.2]   | -13.4 [ -40.1, 13.2]  |
| 17/BTS - 5/BTS                                                     | 17.4 [ 10.4, 24.3]*** | 18.0 [ 3.7, 32.2]**   | 13.4 [ -8.4, 35.2]    | 9.3 [ -17.4, 35.9]    |
| 5/APrem - 5/BTS                                                    | 17.1 [ 10.2, 24.1]*** | 19.5 [ 5.2, 33.7]***  | 22.0 [ 0.2, 43.8]*    | 22.7 [ -3.9, 49.3]    |

B)

| Comparison        | 17/APrem             | 17/BTS                | 5/APrem              | 5/BTS                 |
|-------------------|----------------------|-----------------------|----------------------|-----------------------|
| <b>Tyrode C</b>   |                      |                       |                      |                       |
| 3 min – 60 min    | 0.9 [ -1.2, 2.9]     | -1.0 [ -3.0, 1.1]     | 0.4 [ -1.6, 2.4]     | 0.4 [ -1.6, 2.5]      |
| 3 min – 120 min   | 1.5 [ -2.6, 5.6]     | 0.1 [ -4.1, 4.2]      | 2.6 [ -1.5, 6.8]     | 4.8 [ 0.7, 9.0]**     |
| 3 min – 180 min   | 2.8 [ -2.1, 7.6]     | 2.4 [ -2.5, 7.3]      | 4.6 [ -0.3, 9.4]     | 7.2 [ 2.3, 12.0]***   |
| 60 min – 120 min  | 0.6 [ -2.7, 4.0]     | 1.1 [ -2.3, 4.4]      | 2.2 [ -1.1, 5.6]     | 4.4 [ 1.1, 7.7]**     |
| 60 min – 180 min  | 1.9 [ -2.2, 6.0]     | 3.4 [ -0.7, 7.5]      | 4.2 [ 0.1, 8.3]*     | 6.7 [ 2.6, 10.8]***   |
| 120 min – 180 min | 1.3 [ -1.0, 3.6]     | 2.3 [ 0.0, 4.6]*      | 1.9 [ -0.3, 4.2]     | 2.3 [ 0.1, 4.6]*      |
| <b>Tyrode A</b>   |                      |                       |                      |                       |
| 3 min – 60 min    | 11.3 [ 2.7, 19.9]**  | 16.4 [ 7.8, 25.0]***  | 14.7 [ 6.1, 23.3]*** | 17.0 [ 8.4, 25.6]***  |
| 3 min – 120 min   | 20.2 [ 6.4, 34.1]*** | 30.1 [ 16.2, 43.9]*** | 21.3 [ 7.4, 35.1]*** | 26.1 [ 12.3, 39.9]*** |
| 3 min – 180 min   | 26.7 [ 9.3, 44.0]*** | 38.1 [ 20.8, 55.5]*** | 24.4 [ 7.1, 41.8]*** | 30.0 [ 12.7, 47.4]*** |
| 60 min – 120 min  | 8.9 [ 1.5, 16.3]**   | 13.7 [ 6.3, 21.1]***  | 6.6 [ -0.8, 14.0]    | 9.1 [ 1.7, 16.5]**    |
| 60 min – 180 min  | 15.3 [ 4.2, 26.5]*** | 21.7 [ 10.6, 32.8]*** | 9.8 [ -1.4, 20.9]    | 13.0 [ 1.9, 24.1]**   |
| 120 min – 180 min | 6.4 [ 0.7, 12.1]*    | 8.0 [ 2.4, 13.7]***   | 3.2 [ -2.5, 8.8]     | 3.9 [ -1.8, 9.6]      |

17/APrem: Semen stored at 17°C in AndroStar Premium extender with antibiotic.

17/BTS: Semen stored at 17°C in BTS extender with antibiotic.

5/APrem: Semen stored at 5°C in AndroStar Premium extender without antibiotic.

5/BTS: Semen stored at 5°C in BTS extender with antibiotic.

Supplemental Table S4:

Changes in live, low calcium (propidium iodide and Fluo-3-AM negative) spermatozoa (%) by temperature/extender treatment and storage time point. All results (n=6) are mean  $\pm$  SEM.

|                 | 3 min          | 60 min         | 120 min        | 180 min        |
|-----------------|----------------|----------------|----------------|----------------|
| <b>Tyrode C</b> |                |                |                |                |
| 17/APrem        | 86.1 $\pm$ 0.6 | 85.3 $\pm$ 0.7 | 84.6 $\pm$ 0.6 | 83.3 $\pm$ 0.9 |
| 17/BTS          | 82.9 $\pm$ 0.7 | 83.9 $\pm$ 0.5 | 82.8 $\pm$ 0.6 | 80.5 $\pm$ 0.7 |
| 5/APrem         | 82.1 $\pm$ 1.9 | 81.7 $\pm$ 2.3 | 79.4 $\pm$ 2.0 | 77.5 $\pm$ 2.5 |
| 5/BTS           | 65.6 $\pm$ 2.0 | 65.2 $\pm$ 2.1 | 60.8 $\pm$ 3.2 | 58.4 $\pm$ 3.6 |
| <b>Tyrode A</b> |                |                |                |                |
| 17/APrem        | 85.8 $\pm$ 0.7 | 74.5 $\pm$ 1.1 | 65.6 $\pm$ 2.3 | 59.2 $\pm$ 3.5 |
| 17/BTS          | 82.0 $\pm$ 0.7 | 65.6 $\pm$ 3.2 | 51.9 $\pm$ 6.0 | 43.9 $\pm$ 7.4 |
| 5/APrem         | 81.8 $\pm$ 1.6 | 67.1 $\pm$ 2.1 | 60.5 $\pm$ 3.1 | 57.3 $\pm$ 4.1 |
| 5/BTS           | 64.6 $\pm$ 2.1 | 47.6 $\pm$ 4.2 | 38.5 $\pm$ 5.2 | 34.6 $\pm$ 5.7 |

17/APrem: Semen stored at 17°C in AndroStar Premium extender with antibiotic.

17/BTS: Semen stored at 17°C in BTS extender with antibiotic.

5/APrem: Semen stored at 5°C in AndroStar Premium extender without antibiotic.

5/BTS: Semen stored at 5°C in BTS extender with antibiotic.



Supplemental Table S5:

Distribution of parities of female pigs in the two insemination groups

| Insemination group    | Parity at the time of insemination |      |      |      |      |      |     | Total |      |
|-----------------------|------------------------------------|------|------|------|------|------|-----|-------|------|
|                       | 0 (gilts)                          | 1    | 2    | 3    | 4    | 5    | 6   |       |      |
| <b>17°C/with AB</b>   |                                    |      |      |      |      |      |     |       |      |
| n                     | 71                                 | 63   | 80   | 70   | 46   | 42   | 33  | 405   |      |
| %                     | 17.5                               | 15.6 | 19.8 | 17.3 | 11.4 | 10.4 | 8.2 |       |      |
| <b>5°C/without AB</b> |                                    |      |      |      |      |      |     |       |      |
| n                     | 87                                 | 78   | 73   | 68   | 41   | 45   | 18  | 410   |      |
| %                     | 21.2                               | 19.0 | 17.8 | 16.6 | 10.0 | 11.0 | 4.4 |       |      |
| <b>Total</b>          | <b>n</b>                           | 158  | 141  | 153  | 138  | 87   | 87  | 51    | 815* |

\*Parities of two sows, one in each insemination group, were not recorded and therefore were not considered in the table.

AB: =Antibiotic in semen extender
